# Supplementary material for: AXL Inhibition in Macrophages Stimulates Host-versus-Leukemia Immunity and Eradicates Naïve and Treatment-Resistant Leukemia
Source: PubMed Central journal article supplement — Cancer Discov. 2021 Jun 8;11(11):2924–43. doi: 10.1158/2159-8290.CD-20-1378 (PMC7611942; doi:10.1158/2159-8290.cd-20-1378), 2021-06-08
Supplement: cd-20-1378_supplementary_methods_suppsm1.pdf [file cd-20-1378_supplementary_methods_suppsm1.pdf]

## SUPPLEMENTARY METHODS

### **Multiplex Immunohistochemistry**

For Fig. S8G, the staining procedure was performed on a VENTANA Discovery Ultra instrument. The tissues were deparaffinised and rehydrated using EZ prep solution (Ventana Medical Systems, Tucson, USA) in 3 cycles of 8 min each for a total of 24 min at 69 °C. Antigens were retrieved using CC1 buffer (Ventana Medical Systems, Tucson, USA) for 32 min at 95 °C. Then, the primary antibody was diluted in antibody diluent/block (Akoya Biosciences, Marlborough, USA), added manually to the slides and incubated for 32 min at 36 °C or RT. The matching OmniMap horse radish peroxidase secondary antibody (Ventana Medical Systems, Tucson, USA) was automatically applied for 12 min. Subsequently, the Opal TSA fluorophore (Akoya Biosciences, Marlborough, USA) was diluted in amplification diluent (Akoya Biosciences, Marlborough, USA), added to the sections manually and incubated for 8 min. A denaturation step was performed at 100 °C for 24 min in CC2 buffer (Ventana Medical Systems, Tucson, USA) to remove primary and secondary antibodies. All steps, from primary antibody to stripping, were repeated for each marker until a 3-plex staining was achieved. The sections were then counterstained with DAPI (Merck, Darmstadt, Germany), washed and mounted using Fluoromount-G mounting medium (SouthernBiotech, Birmingham, USA). Primary antibodies used: Axl (AF854, R&D Systems, 1:100), Iba1 (NBP2-19019, NovusBiologicals, 1:100) and GFP (ab6673, abcam, 1:350). Detection was carried out using TSA fluorophores Opal 570 (1:250), Opal 520 (1:100), Opal 570 (1:100) and Opal 650 (1:100), respectively. Multispectral images were obtained using the Vectra 3.0 Automated Imaging System (Akoya Biosciences, Marlborough, USA). Spectral unmixing was performed in inForm (Akoya Biosciences, Marlborough, USA), using a previously built library consisting of single stained tissue slides for each TSA fluorophore.

### **Generation of Gas6-deficient NSG Mice by CRISPR-editing of NSG Zygotes**

Immune-compromised Gas6-deficient mice were generated by inactivation of the *Gas6* gene using CRISPR-Cas9 editing in *NOD.Cg-Prkdc<sup>scid</sup> IL2rgtmWjl/Sz* (NSG) zygotes, as indicated in Supplementary Fig. S3C, using a workflow that was previously described by our group (1). Briefly, gRNA targeting exon 2 of the *Gas6* gene, Cas9 mRNA (5meC, Psi) (Tebu-Bio# L-

6125-100) and a single strand DNA donor template were microinjected in NSG zygotes. The ssDNA template was designed to introduce an in-frame stop codon, an EcoRI restriction site and a mutation in the PAM sequence. The EcoRI site was used to screen edited mice by RFLP (Restriction Fragment Length Polymorphism) assay. All primers used are described in the key resources table. Mutation of the PAM site was used to prevent secondary editing of any productively edited allele. Insertion of the stop codon in an early translated exon expectedly halted translation thereby inducing non-sense mediated mRNA decay (NMD) leading to absence of Gas6 protein, as demonstrated by ELISA, in all four newly generated Gas6 homozygous edited mouse lines (line 697-21, 27, 29 and 31; Supplementary Fig. S3D). Experiments were carried out using NSG *Gas6*<sup>-/-</sup> lines #29 and #31 with indistinguishable results (Figure 1N and Supplementary Figure S3E). Editing at predicted off-target sites was excluded by amplicon sequencing as described previously (1). Genome editing of NSG zygotes using CRISPR/Cas9 was approved by the Regierungspräsidium Karlsruhe under animal protocol number G50/15.

### **Generation of Syngeneic Leukemia Models**

**The *Asx1* myeloid leukemia model** was established by serially transplanting spleen cells from a mouse that developed disease symptoms 39 weeks after inducible ablation of *Asx1* selectively in hematopoietic cells. Briefly, aged *MxCre*<sup>+</sup> *Asx1*<sup>ff</sup> mice (50 weeks) were treated with polyinosinic-polycytidylic acid (pl:pC) (InvivoGen) every other day at a dose of 20 mg/kg of body weight, and followed for signs of disease by monthly bleeding. Over an additional period of 39 weeks, 4 out of 5 mice remained symptoms free with white blood counts within normal range. One mouse (#83501) however developed disease symptoms with prominent expansion of immature blasts with significantly reduced *Asx1* expression as shown by real time PCR and an aberrant CD11b<sup>dim</sup>B220<sup>dim</sup> surface phenotype (Supplementary Fig. S1C). H&E staining of the spleen and liver, as well as myeloperoxidase staining in the liver, demonstrated massive infiltration of both organs by immature myeloblasts as well as limited signs of extramedullary hematopoiesis in the spleen as shown by prominent erythroid cell clusters and detectable megakaryocytes. However, no mature granulocytes were detected (Supplementary Fig. S1D). Most importantly the disease was serially transplantable, using

spleen cells from the primary mouse, to non-irradiated recipients with a penetrance that was dependent on the cells dose injected (Supplementary Fig. S1E). Non-irradiated recipient mice displayed massive hepatosplenomegaly (Supplementary Fig. S1F) with massive infiltration of spleen and liver by blast cells (Supplementary Fig. S1G) as well as a high number of circulating blasts as evidenced by Pappenheim's staining of peripheral blood smears (Supplementary Fig. S1H). Bio-banked cells from the spleens of the primary and secondary wild type recipients were used for all experiments described in this study. Secondary and tertiary recipients showed comparable hepatosplenomegaly and high number of circulating myeloblasts in the peripheral blood (Supplementary Fig. S1H)

**Primary BCR-ABL1-driven B-cell acute lymphoblastic leukemia** (Ph<sup>+</sup> B-ALL) were generated by isolating untreated bone marrow cells from *Arf*<sup>-/-</sup> mice (The Jackson Laboratories, line #029676) and subsequently subjecting them to *ex-vivo* spin infection (3000 rpm, 33C, 2h) in IMDM media (Gibco) supplemented with 20 ng/ml recombinant mouse IL7 (Peprotech) and 4.5 µg/ml polybrene (Merck Millipore), using a retrovirus expressing both the human BCR-ABL1<sup>p190</sup> fusion oncoprotein and the green fluorescent protein (GFP) that serves as a reporter for BCR-ABL1 expression (MSCV-BCR-ABL1-IRES-GFP; gift from Dr. Jacques Ghysdael). After transduction these cells were transferred to lethally irradiated (9 Gy) wild type C57BL/6 host recipients. All mice developed full blow precursor B-ALL within 30-60 days (data not shown). Bone marrow cells from these primary mice exhibited high frequency of GFP<sup>+</sup>B220<sup>dim</sup> B-ALL blasts. Bone marrow cells from several primary mice were explanted and *in vitro* adapted by culturing on MS5 mesenchymal stromal cells in RPMI containing 15% FBS, 1% penicillin-streptomycin, 1% L-Glutamine and 10mM HEPES. After a short adaptation period on MS5 cells, primary leukemic cells could be expanded and maintained as independent primary GFP<sup>+</sup> leukemic lines (L1, L2, L3) in a stroma-independent fashion and serially transplanted in non-irradiated mice as depicted by the Kaplan-Meier survival analysis of recipient mice transplanted with a 10<sup>3</sup> GFP<sup>+</sup> B-ALL cells from n = 3 independent primary leukemia lines (L1, L2 and L3) in Supplementary Fig. S1J. For all established B-ALL lines, disease penetrance was 100% after transplantation of as little as 10<sup>3</sup> cells to non-irradiated recipients. Latencies were also comparable for all established leukemia, with a median survival between 12 and 20 days (Supplementary Fig. S1J and data not shown).

## KEY RESOURCES

| REAGENT or RESOURCE                | SOURCE         | IDENTIFIER                         |
|------------------------------------|----------------|------------------------------------|
| <b>Antibodies</b>                  |                |                                    |
| Anti-mouse CD45-BV786              | BD Biosciences | Cat# 564225;<br>RRID:AB_2716861    |
| Anti-mouse CD45.1-FITC             | eBioscience    | Cat# 11-0453-85;<br>RRID:AB_465059 |
| Anti-mouse CD45.2-PE               | eBioscience    | Cat# 12-0454-83;<br>RRID:AB_465679 |
| Anti-mouse Gr1-PECY7               | BD Biosciences | Cat# 552985;<br>RRID:AB_394535     |
| Anti-mouse CD3-APC-Cy7             | BD Biosciences | Cat# 100222;<br>RRID:AB_2242784    |
| Anti-mouse CD8a-AF700              | BD Biosciences | Cat# 564983;<br>RRID:AB_2739032    |
| Anti-mouse CD8-PE-Cy7              | BD Biosciences | Cat# 25-0081-82;<br>RRID:AB_469584 |
| Anti-mouse CD4-PE-Cy7              | eBioscience    | Cat# 25-0041-82;<br>RRID:AB_469576 |
| Anti-mouse B220-APC                | BD Biosciences | Cat# 553092;<br>RRID:AB_398531     |
| Anti-mouse B220-BV711              | BD Biosciences | Cat# 563892;<br>RRID:AB_2738470    |
| Anti-mouse NK1.1-PECF594           | BD Biosciences | Cat# 562864;<br>RRID:AB_2737850    |
| Anti-mouse CD11b-FITC              | BD Biosciences | Cat# 553310;<br>RRID:AB_394774     |
| Anti-mouse CD11b-PECF594           | BD Biosciences | Cat# 562317;<br>RRID:AB_11154422   |
| Anti-mouse CD11c-AF700             | BD Biosciences | Cat# 560583;<br>RRID:AB_1727421    |
| Anti-mouse F4/80-PE                | BD Biosciences | Cat# 565410;<br>RRID:AB_2687527    |
| Anti-mouse MHC-II-BV650            | BD Biosciences | Cat# 563415;<br>RRID:AB_2738192    |
| Anti-mouse Annexin V-APC           | BD Biosciences | Cat# 550475                        |
| Anti-mouse Axl-APC                 | eBiosciences   | Cat# 17-1084-82<br>RRID:AB_2734848 |
| Anti-mouse FoxP3-PE                | BD Biosciences | Cat# 12-5773-82;<br>RRID:AB_465936 |
| Anti-mouse MHC-II-BV786            | BD Biosciences | Cat# 563415;<br>RRID:AB_2738192    |
| Anti-mouse DX5_APC                 | eBioscience    | Cat# 17-5971-81<br>RRID:AB_469484  |
| Anti-human CD45-PE                 | BD Biosciences | Cat# 555483;<br>RRID:AB_2649445    |
| Anti-human CD14-APCCY7             | BD Biosciences | Cat# 557831;<br>RRID:AB_396889     |
| CD16/32 Fc Block                   | BD Biosciences | Cat# 553441<br>RRID:AB_394861      |
| One Comp Beads                     | eBiosciences   | Cat# 01-1111-42                    |
| Cytometer Setup and Tracking beads | BD Biosciences | Cat# 641319                        |
| Anti-mouse IgG1                    | BD Biosciences | Cat# 553441;<br>RRID:AB_394861     |
| Anti-human GAS6                    | Sigma-Aldrich  | Cat# HPA008275;<br>RRID:AB_1849497 |

|                                                      |                                                                                                         |                                     |
|------------------------------------------------------|---------------------------------------------------------------------------------------------------------|-------------------------------------|
| Anti-human CD10                                      | Novocastra-Leica Biosystems                                                                             | Cat# ORG-8941                       |
| Anti-GFP (IHC)                                       | Abcam                                                                                                   | Cat# ab6673;<br>RRID:AB_305643      |
| Anti-Goat IgG (H+L)                                  | Vector Laboratories                                                                                     | Cat# BA-5000;<br>RRID:AB_2336126    |
| Anti-GFP (IF)                                        | Abcam                                                                                                   | Cat# ab13970;<br>RRID:AB_300798     |
| Anti-Chicken AF488                                   | Jackson ImmunoResearch Labs                                                                             | Cat# 703-545-155<br>RRID:AB_2340375 |
| Anti-mouse Iba1 (Rabbit)                             | Wako Chemicals                                                                                          | Cat# 019-19741<br>RRID:AB_839504    |
| Anti-Rabbit AF594                                    | Jackson ImmunoResearch Labs                                                                             | Cat# 711-586-152<br>RRID:AB_2340622 |
| Anti-human/mouse Iba1 (Goat)                         | Abcam                                                                                                   | Cat# 48004<br>RRID:AB_870576        |
| Anti-Goat AF594                                      | Jackson ImmunoResearch Labs                                                                             | Cat# 705-586-147<br>RRID:AB_2340434 |
| Anti-human/mouse Phospho_AXL (Y779)                  | R&D                                                                                                     | Cat# AF2228<br>RRID:AB_2062560      |
| Anti-Rabbit AF647                                    | Jackson ImmunoResearch Labs                                                                             | Cat# 711-606-152<br>RRID:AB_2340625 |
| Anti-mouse Axl                                       | R&D                                                                                                     | Cat# AF854<br>RRID:AB_355663        |
| Anti-mouse Gas6                                      | R&D                                                                                                     | Cat# ab13970<br>RRID:AB_300798      |
| Anti-Goat AF647                                      | Jackson ImmunoResearch Labs                                                                             | Cat# 705-606-147<br>RRID:AB_2340438 |
| Anti-human Myeloperoxidase                           | ThermoFisher Scientific                                                                                 | Cat# RB-373-R7;<br>RRID:AB_59600    |
| Anti-mouse CD8a                                      | InVivoMAb                                                                                               | Cat# BE0061;<br>RRID:AB_1125541     |
| Rat IgG2b                                            | InVivoMAb                                                                                               | Cat# BE0090;<br>RRID:AB_1107780     |
| Anti-mouse NK1.1                                     | InVivoMAb                                                                                               | Cat# BE0036,<br>RRID:AB_1107737     |
| Mouse IgG2a                                          | InVivoMAb                                                                                               | Cat# BE0085,<br>RRID:AB_1107771     |
| Anti-mouse PD1                                       | InVivoMAb                                                                                               | Cat# BE0146,<br>RRID:AB_10949053    |
| Rat IgG2a                                            | InVivoMAb                                                                                               | Cat# BE0089,<br>RRID:AB_1107769     |
| Anti-mouse IL12p40                                   | InVivoMAb                                                                                               | Cat# BE0051<br>RRID:AB_1107698      |
| Anti-mouse TNFa                                      | InVivoMAb                                                                                               | Cat# BE0058<br>RRID:AB_1107764      |
| Anti-mouse IL10                                      | InVivoMAb                                                                                               | Cat# BE0049<br>RRID:AB_1107696      |
| Rat IgG1                                             | InVivoMAb                                                                                               | Cat# BE0088<br>RRID:AB_1107775      |
| <b>Biological Samples</b>                            |                                                                                                         |                                     |
| Bone marrow biopsies                                 | Faculty of Medicine of the Technical University of Munich and the University Hospital Carl Gustav Carus | Table S1                            |
| <b>Chemicals, Peptides, and Recombinant Proteins</b> |                                                                                                         |                                     |
| Nilotinib                                            | APExBIO                                                                                                 | A8232                               |
| Bemcentinib                                          | BergenBio, ASA                                                                                          | N/A                                 |

|                                                                   |                           |                  |
|-------------------------------------------------------------------|---------------------------|------------------|
| Vincristine sulfate                                               | APExBIO                   | Cat# A1765       |
| M-CSF                                                             | ThermoFisher Scientific   | Cat# 14-8983-80  |
| INFg                                                              | Peptotech                 | Cat# 315-05      |
| Chlodronate liposomes                                             | Liposoma BV               | Cat# C-030       |
| LPS                                                               | Sigma-Aldrich             | Cat# L4391       |
| polyI:polyC                                                       | InVivoGen                 | Cat# tlr-pic-5   |
| Tween 80                                                          | Sigma-Aldrich             | Cat# P4780       |
| Methyl Cellulose 400cp                                            | Sigma-Aldrich             | Cat# M0262       |
| Propidium iodide                                                  | Sigma-Aldrich             | Cat# P4170       |
| Roti@-Histofix 4 %                                                | Carl Roth                 | Cat# P087.3      |
| 0.5 M EDTA PH7.4                                                  | Sigma-Aldrich             | Cat# ED2SS       |
| penicillin-streptomycin (Gibco)                                   | Thermo Fischer Scientific | Cat# 15140-122   |
| HEPES 1M                                                          | Sigma-Aldrich             | Cat# H0887       |
| L-Glutamine (Gibco)                                               | Thermo Fischer Scientific | Cat# 25030-024   |
| Fetal Bovine Serum (Gibco)                                        | Thermo Fischer Scientific | Cat# 10270106    |
| Cell Trace Violet                                                 | Thermo Fischer Scientific | Cat# C34557      |
| Ficoll-Paque Plus                                                 | GE Healthcare             | Cat# 17-1440-02  |
| StemSpan™ SFEM                                                    | Stem Cell Technologies    | Cat# 09650       |
| RPMI 1640 (Gibco)                                                 | Thermo Fischer Scientific | Cat# 31870-025   |
| DMEM (Gibco)                                                      | Thermo Fischer Scientific | Cat# 21969-035   |
| IMDM (Gibco)                                                      | Thermo Fischer Scientific | Cat# 21980-032   |
| Recombinant mouse IL7                                             | Peptotech                 | Cat# 407-ML      |
| Polybrene                                                         | Merck Millipore           | Cat# TR-1003-G   |
| Hoechst 33342                                                     | Thermo Fischer Scientific | Cat# H3570       |
| PBS                                                               | Gibco                     | Cat# 14190-094   |
| Sucrose                                                           | CarlRoth                  | Cat# 9097.1      |
| OCT                                                               | Weckert Labortechnik      | Cat# 600001      |
| Triton-X 100                                                      | Sigma Aldrich             | Cat# X100        |
| BSA                                                               | Biomol                    | Cat# BSA-50      |
| <b>Critical Commercial Assays</b>                                 |                           |                  |
| Bond Polymer Refine Detection kit                                 | Leica Biosystems          | Cat# DS9800-CN   |
| Bond Intense R Detection                                          | Leica Biosystems          | Cat# DS9263      |
| PicoPure™ RNA Isolation Kit                                       | ThermoFisher Scientific   | Cat# KIT0204     |
| SuperScript™ VILO™ cDNA Synthesis Kit                             | ThermoFisher Scientific   | Cat# 11754050    |
| Power SYBR™ Green PCR Master Mix                                  | ThermoFisher Scientific   | Cat# 4368702     |
| Microvette® 500 Z-Gel                                             | Sarstedt                  | Cat# 20.1344     |
| Mouse Gas6 DuoSet ELISA                                           | R&D Systems               | Cat# DY986       |
| Anti-F4/80 MicroBeads UltraPure, mouse                            | Miltenyi Biotec           | Cat# 130-110-443 |
| CD14-Microbeads, human                                            | Miltenyi Biotec           | Cat# 130-050-201 |
| Cytofix/Cytoperm plus                                             | BD Biosciences            | Cat# 555028      |
| Chromium Next GEM Single Cell 3' GEM, Library & Gel Bead Kit v3.1 | 10X Genomics              | Cat# PN-1000121  |
| Qubit™ dsDNA HS Assaykit                                          | ThermoFisher Scientific   | Cat# Q32851      |
| Bioanalyzer High Sensitivity DNA Kit                              | Agilent                   | Cat# 5067-4626   |
| NextSeq500/550 high output kit v2.5 (75 cycles)                   | Illumina                  | Cat# 20024906    |
| Venor GeM OneStep (Mycoplasma PCR kit)                            | Minerva biolabs           | Cat# 11-8100     |
| AF700 fixable viability dye                                       | BD Biosciences            | Cat# 564997      |
| Nunc™ Multidishes with UpCell™                                    | ThermoFisher Scientific   | Cat# 174899      |
| <b>Deposited Data</b>                                             |                           |                  |

|                                                                                                                                                                                                                                               |                                                            |                                                                                                                                 |
|-----------------------------------------------------------------------------------------------------------------------------------------------------------------------------------------------------------------------------------------------|------------------------------------------------------------|---------------------------------------------------------------------------------------------------------------------------------|
| ImmGen ULI RNASeq data group                                                                                                                                                                                                                  | Immunological Genome Project (ImmGen)                      | <a href="http://www.immgen.org/Databrowser19/DatabrowserPage.html">http://www.immgen.org/Databrowser19/DatabrowserPage.html</a> |
| Hummel et al. B-cell lymphoma dataset                                                                                                                                                                                                         | (2)                                                        | GSE4475                                                                                                                         |
| AML dataset from The Cancer Genome Atlas (TCGA)                                                                                                                                                                                               | (3)                                                        | TCGA-LAML                                                                                                                       |
| Single cell RNA sequencing described in Figure 3                                                                                                                                                                                              | This work                                                  | European Nucleotide Archive ( <a href="https://www.ebi.ac.uk/en">https://www.ebi.ac.uk/en</a> ); accession number: PRJEB43830   |
| <b>Experimental Models: Cell Lines</b>                                                                                                                                                                                                        |                                                            |                                                                                                                                 |
| Mouse: Mesenchymal stromal cells MS-5                                                                                                                                                                                                         | DSMZ-German Collection of Microorganisms and Cell Cultures | Cat# ACC-441; RRID:CVCL_2128                                                                                                    |
| Platinum-E (Plat-E) Retroviral Packaging Cell Line                                                                                                                                                                                            | Gift from Jacques Ghysdael; (4)                            | N/A                                                                                                                             |
| <b>Experimental Models: Organisms/Strains</b>                                                                                                                                                                                                 |                                                            |                                                                                                                                 |
| Mouse: MxCre Asxl1 <sup>ff</sup>                                                                                                                                                                                                              | Laboratory of Omar Abdel-Wahab; (5)                        | N/A                                                                                                                             |
| Mouse: Gas6 <sup>tm1.1(KOMP)Vlqg</sup>                                                                                                                                                                                                        | Knock Out Mouse Project (KOMP) Repository                  | <a href="https://www.komp.org/index.php">https://www.komp.org/index.php</a>                                                     |
| Mouse: C57BL/6N                                                                                                                                                                                                                               | The Jackson Laboratory                                     | Cat# JAX:005304; RRID:IMSR_JAX:005304                                                                                           |
| Mouse: C57BL/6J                                                                                                                                                                                                                               | The Jackson Laboratory                                     | Cat# JAX:000664; RRID:IMSR_JAX:000664                                                                                           |
| Mouse: B6.SJL- <i>Ptprca</i> <sup>a</sup> <i>Peppcb</i> <sup>b</sup> /BoyJ (CD45.1)                                                                                                                                                           | The Jackson Laboratory                                     | Cat# JAX: 002014; RRID:IMSR_JAX:002014                                                                                          |
| Mouse: NOD.Cg-Prkdc <sup>scid</sup> Il2rg <sup>tm1Wjl</sup> /SzJ (NSG)                                                                                                                                                                        | The Jackson Laboratory                                     | Cat# JAX:005557; RRID:IMSR_JAX:005557                                                                                           |
| Mouse: NSG Gas6 <sup>-/-</sup>                                                                                                                                                                                                                | This paper                                                 | N/A                                                                                                                             |
| Mouse: Csf1r-Cre Axl <sup>ff</sup>                                                                                                                                                                                                            | Laboratory of Carla Rothlin & Sourav Ghosh; (6)            | N/A                                                                                                                             |
| Mouse: CD11c-eGFP-Cre Axl <sup>ff</sup>                                                                                                                                                                                                       | Laboratory of Carla Rothlin & Sourav Ghosh; (7)            | N/A                                                                                                                             |
| Mouse: B6.129S2-Cd8a <sup>tm1Mak</sup> /J (CD8 <sup>-/-</sup> )                                                                                                                                                                               | The Jackson Laboratory                                     | Cat# JAX:002665 RRID:IMSR_JAX:002665                                                                                            |
| Mouse: B6;129S4-Socs3 <sup>tm1Ayo</sup> /J                                                                                                                                                                                                    | The Jackson Laboratory                                     | Cat# JAX:010944 RRID:IMSR_JAX:010944                                                                                            |
| Mouse: B6(Cg)-Sting1 <sup>tm1.2Camb</sup> /J ( <i>Sting</i> <sup>-/-</sup> )                                                                                                                                                                  | The Jackson Laboratory                                     | Cat# JAX:025805 RRID:IMSR_JAX:025805                                                                                            |
| <b>Oligonucleotides</b>                                                                                                                                                                                                                       |                                                            |                                                                                                                                 |
| Cas9 mRNA NLS – 5-methyl-C, pseudo-U                                                                                                                                                                                                          | Tebu-Bio                                                   | Cat# 040L-6125-100                                                                                                              |
| Cas9-mGas6-gRNA1rv<br>AAA CCA CGC GCC CGC AAC AGC ACA C                                                                                                                                                                                       | IDT DNA                                                    | N/A                                                                                                                             |
| Cas9-mGas6-gRNA1fw<br>CAC CGT GTG CTG TTG CGG GCG CGT G                                                                                                                                                                                       | IDT DNA                                                    | N/A                                                                                                                             |
| Donor IHRES template:<br>ssDNAmGas6Cas9gRNA1mis<br>CCC GAG TGG GTG TAG GTT GAC CGT<br>ACA CCC TTC TTT CTG CAG CTG TGC<br>TGT TGC GGG CGT GAG AAT TCC GTG<br>ACG CGG CGC AGT TTC TGC GGC CCA<br>GGC AGC GCC GCG CCT ACC AAG TCT<br>TCG AGG AGG | IDT DNA                                                    | N/A                                                                                                                             |
| Primer: mGas6ex2-RFL-FW<br>TGGCTTCCGAGTCTTCTCAC                                                                                                                                                                                               | IDT DNA                                                    | N/A                                                                                                                             |

|                                                  |                                                                                       |                                                                                                                                           |
|--------------------------------------------------|---------------------------------------------------------------------------------------|-------------------------------------------------------------------------------------------------------------------------------------------|
| Primer: mGas6ex2-RFL-RV<br>TGGAGCCCACTCAAGGATAC  | IDT DNA                                                                               | N/A                                                                                                                                       |
| Primer : Axl FW :<br>CGAGAGGTGACCTTGGAAC         | (6)                                                                                   | N/A                                                                                                                                       |
| Primer : Axl RV :<br>AGATGGTGGAGTGGCTGTC         | (6)                                                                                   | N/A                                                                                                                                       |
| Primer : Sdha FW :<br>AAGTTGAGATTTGCCGATGG       | (1)                                                                                   | N/A                                                                                                                                       |
| Primer : Sdha RV :<br>TGGTTCTGCATCGACTTCTG       | (1)                                                                                   | N/A                                                                                                                                       |
| <b>Taqman probes</b>                             |                                                                                       |                                                                                                                                           |
| Mouse <i>Gas6</i> (Probe ID: Mm00490378_m1)      | ThermoFisher Scientific                                                               | Cat# 4331182                                                                                                                              |
| Mouse <i>Pros1</i> (Probe ID: Mm01343426_m1)     | ThermoFisher Scientific                                                               | Cat# 4331182                                                                                                                              |
| Mouse <i>Axl</i> (Probe ID: Mm00437221_m1)       | ThermoFisher Scientific                                                               | Cat# 4331182                                                                                                                              |
| Mouse <i>Mertk</i> (Probe ID: Mm00434920_m1)     | ThermoFisher Scientific                                                               | Cat# 4331182                                                                                                                              |
| Mouse <i>Tyro3</i> (Probe ID: Mm00444547_m1)     | ThermoFisher Scientific                                                               | Cat# 4331182                                                                                                                              |
| Mouse <i>Il12b</i> (Probe ID: Mm01288989_m1)     | ThermoFisher Scientific                                                               | Cat# 4331182                                                                                                                              |
| Mouse <i>Tnfa</i> (Probe ID: Mm00443258_m1)      | ThermoFisher Scientific                                                               | Cat# 4331182                                                                                                                              |
| Mouse <i>Asx11</i> (Probe ID: Mm0898215_m1)      | ThermoFisher Scientific                                                               | Cat# 4331182                                                                                                                              |
| Mouse <i>Retnla</i> (Probe ID: Mm00445109_m1)    | ThermoFisher Scientific                                                               | Cat# 4331182                                                                                                                              |
| Mouse <i>Chil3</i> (Probe ID: Mm00657889_mH)     | ThermoFisher Scientific                                                               | Cat# 4331182                                                                                                                              |
| Mouse <i>Arg1</i> (Probe ID: Mm00475988_m1)      | ThermoFisher Scientific                                                               | Cat# 4331182                                                                                                                              |
| Mouse <i>Il10</i> (Probe ID: Mm01288386_m1)      | ThermoFisher Scientific                                                               | Cat# 4331182                                                                                                                              |
| Mouse <i>Tgfb1</i> (Probe ID: Mm01178820_m1)     | ThermoFisher Scientific                                                               | Cat# 4331182                                                                                                                              |
| Mouse <i>Sdha</i> (Probe ID: Mm01352366_m1)      | ThermoFisher Scientific                                                               | Cat# 4331182                                                                                                                              |
| Mouse <i>Ubc</i> (Probe ID: Mm02525934_g1)       | ThermoFisher Scientific                                                               | Cat# 4331182                                                                                                                              |
| Human <i>GAS6</i> (Probe ID: Hs01090305_m1)      | ThermoFisher Scientific                                                               | Cat# 4331182                                                                                                                              |
| Human <i>GUSB</i> (Probe ID: Hs00939627_m1)      | ThermoFisher Scientific                                                               | Cat# 4331182                                                                                                                              |
| <b>Recombinant IHRES</b>                         |                                                                                       |                                                                                                                                           |
| pMIG-p190 <sup>BCR-ABL1</sup> -IHRES-GFP         | Laboratory of Jacques Ghysdael                                                        | N/A                                                                                                                                       |
| <b>Software and Algorithms</b>                   |                                                                                       |                                                                                                                                           |
| FACS Diva                                        | BD Biosciences                                                                        | N/A                                                                                                                                       |
| FlowJo, v10.4.2                                  | FlowJo, LLC                                                                           | N/A                                                                                                                                       |
| GraphPad Prism v7                                | GraphPad Software                                                                     | N/A                                                                                                                                       |
| AxioVision SE64 v4.9                             | Zeiss                                                                                 | Cat# 410130-0909-000                                                                                                                      |
| QuPath v0.2.3                                    | (8)                                                                                   | <a href="https://qupath.github.io">https://qupath.github.io</a>                                                                           |
| R2: Genomics Analysis and Visualization Platform | Department of Oncogenomics, Academic Medical Center (AMC) Amsterdam, the Netherlands. | <a href="https://r2.amc.nl">https://r2.amc.nl</a>                                                                                         |
| SurvExpress                                      | (9)                                                                                   | <a href="http://bioinformatica.mty.itesm.mx:8080/Biomatec/SurvivaX.jsp">http://bioinformatica.mty.itesm.mx:8080/Biomatec/SurvivaX.jsp</a> |
| Cell Ranger mkfastq version 3.1.0                | 10X Genomics                                                                          | N/A                                                                                                                                       |
| R version 3.6.2                                  |                                                                                       | <a href="https://www.r-project.org">https://www.r-project.org</a>                                                                         |
| Seurat package                                   | (10)                                                                                  | <a href="https://satijalab.org/seurat/">https://satijalab.org/seurat/</a>                                                                 |



### Supplementary References

1. Tirado-Gonzalez I, Czlonka E, Nevmerzhitskaya A, Soetopo D, Bergonzani E, Mahmoud A, *et al.* CRISPR/Cas9-edited NSG mice as PDX models of human leukemia to address the role of niche-derived SPARC. *Leukemia* **2018**;32(4):1049-52 doi 10.1038/leu.2017.346.
2. Hummel M, Bentink S, Berger H, Klapper W, Wessendorf S, Barth TF, *et al.* A biologic definition of Burkitt's lymphoma from transcriptional and genomic profiling. *N Engl J Med* **2006**;354(23):2419-30 doi 10.1056/NEJMoa055351.
3. Cancer Genome Atlas Research N, Ley TJ, Miller C, Ding L, Raphael BJ, Mungall AJ, *et al.* Genomic and epigenomic landscapes of adult de novo acute myeloid leukemia. *N Engl J Med* **2013**;368(22):2059-74 doi 10.1056/NEJMoa1301689.
4. Morita S, Kojima T, Kitamura T. Plat-E: an efficient and stable system for transient packaging of retroviruses. *Gene Ther* **2000**;7(12):1063-6 doi 10.1038/sj.gt.3301206.
5. Abdel-Wahab O, Gao J, Adli M, Dey A, Trimarchi T, Chung YR, *et al.* Deletion of *Asx1* results in myelodysplasia and severe developmental defects in vivo. *The Journal of experimental medicine* **2013**;210(12):2641-59 doi 10.1084/jem.20131141.
6. Bosurgi L, Cao YG, Cabeza-Cabrerizo M, Tucci A, Hughes LD, Kong Y, *et al.* Macrophage function in tissue repair and remodeling requires IL-4 or IL-13 with apoptotic cells. *Science* **2017**;356(6342):1072-6 doi 10.1126/science.aai8132.
7. Schmid ET, Pang IK, Carrera Silva EA, Bosurgi L, Miner JJ, Diamond MS, *et al.* AXL receptor tyrosine kinase is required for T cell priming and antiviral immunity. *Elife* **2016**;5 doi 10.7554/eLife.12414.
8. Bankhead P, Loughrey MB, Fernandez JA, Dombrowski Y, McArt DG, Dunne PD, *et al.* QuPath: Open source software for digital pathology image analysis. *Sci Rep* **2017**;7(1):16878 doi 10.1038/s41598-017-17204-5.
9. Aguirre-Gamboa R, Gomez-Rueda H, Martinez-Ledesma E, Martinez-Torteya A, Chacolla-Huaringa R, Rodriguez-Barrientos A, *et al.* SurvExpress: an online biomarker validation tool and database for cancer gene expression data using survival analysis. *PLoS One* **2013**;8(9):e74250 doi 10.1371/journal.pone.0074250.
10. Stuart T, Butler A, Hoffman P, Hafemeister C, Papalexi E, Mauck WM, 3rd, *et al.* Comprehensive Integration of Single-Cell Data. *Cell* **2019**;177(7):1888-902 e21 doi 10.1016/j.cell.2019.05.031.
